# Supplementary material for: Enhanced photocatalytic cytotoxic activity of Ag@Fe-doped TiO2 nanocomposites against human epithelial carcinoma cells
Source: Royal Society of Chemistry journal article supplement (doi:10.1039/c2jm15636a), 2012-01-01
Supplement: c2jm15636a.pdf [file c2jm15636a.pdf]

## Enhanced Photocatalytic Activity of Ag @ Fe-doped TiO<sub>2</sub> Composite Nanoclusters against Human Epithelial Carcinoma Cells

Md. Abdulla-Al-Mamun, Yoshihumi Kusumoto,\* Md. Shariful Islam

Department of Chemistry and Bioscience, Graduate School of Science and Engineering,  
Kagoshima University, 1-21-35 Korimoto, Kagoshima 890-0065, Japan

\*E-mail: [kusumoto@sci.kagoshima-u.ac.jp](mailto:kusumoto@sci.kagoshima-u.ac.jp)

### Supporting data

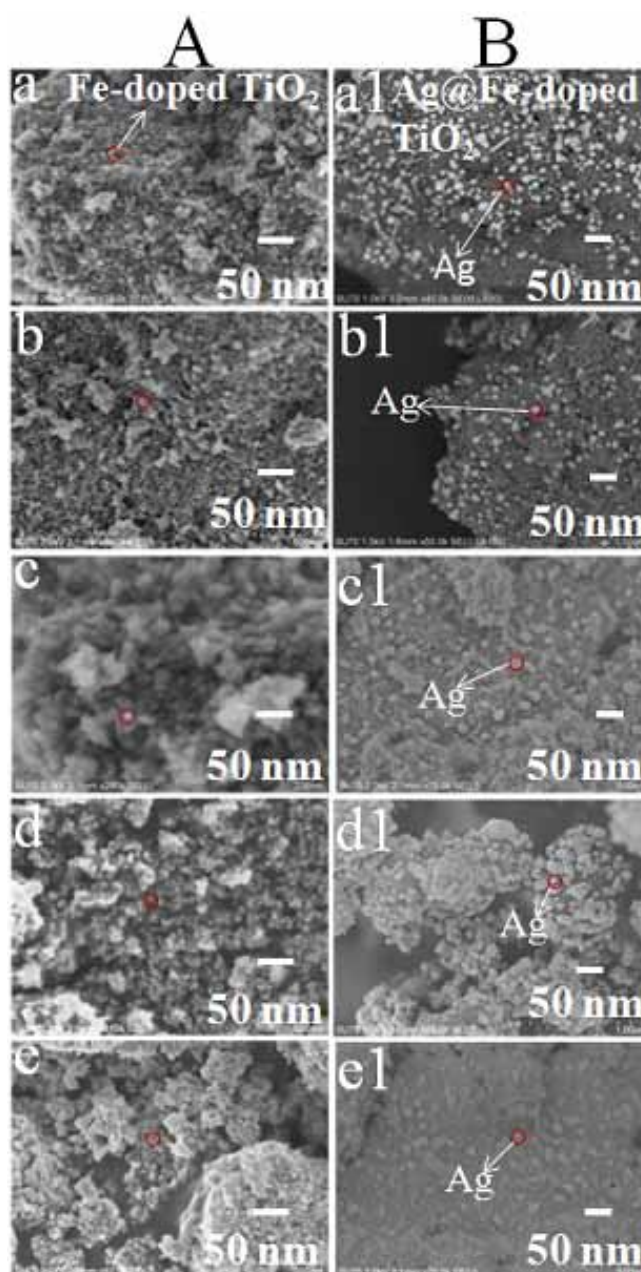

**Fig. S1.** SEM images of (A) 1,3,5,7 and 10% (Fe content; a,b,c,d and e) Fe-doped TiO<sub>2</sub> and (B) 1,3,5,7, and 10% (Fe content; a1,b1,c1,d1 and e1) Ag@Fe-doped TiO<sub>2</sub> composite nanoclusters. The images clearly show that Ag is homogeneously dispersed on Fe-doped TiO<sub>2</sub>.

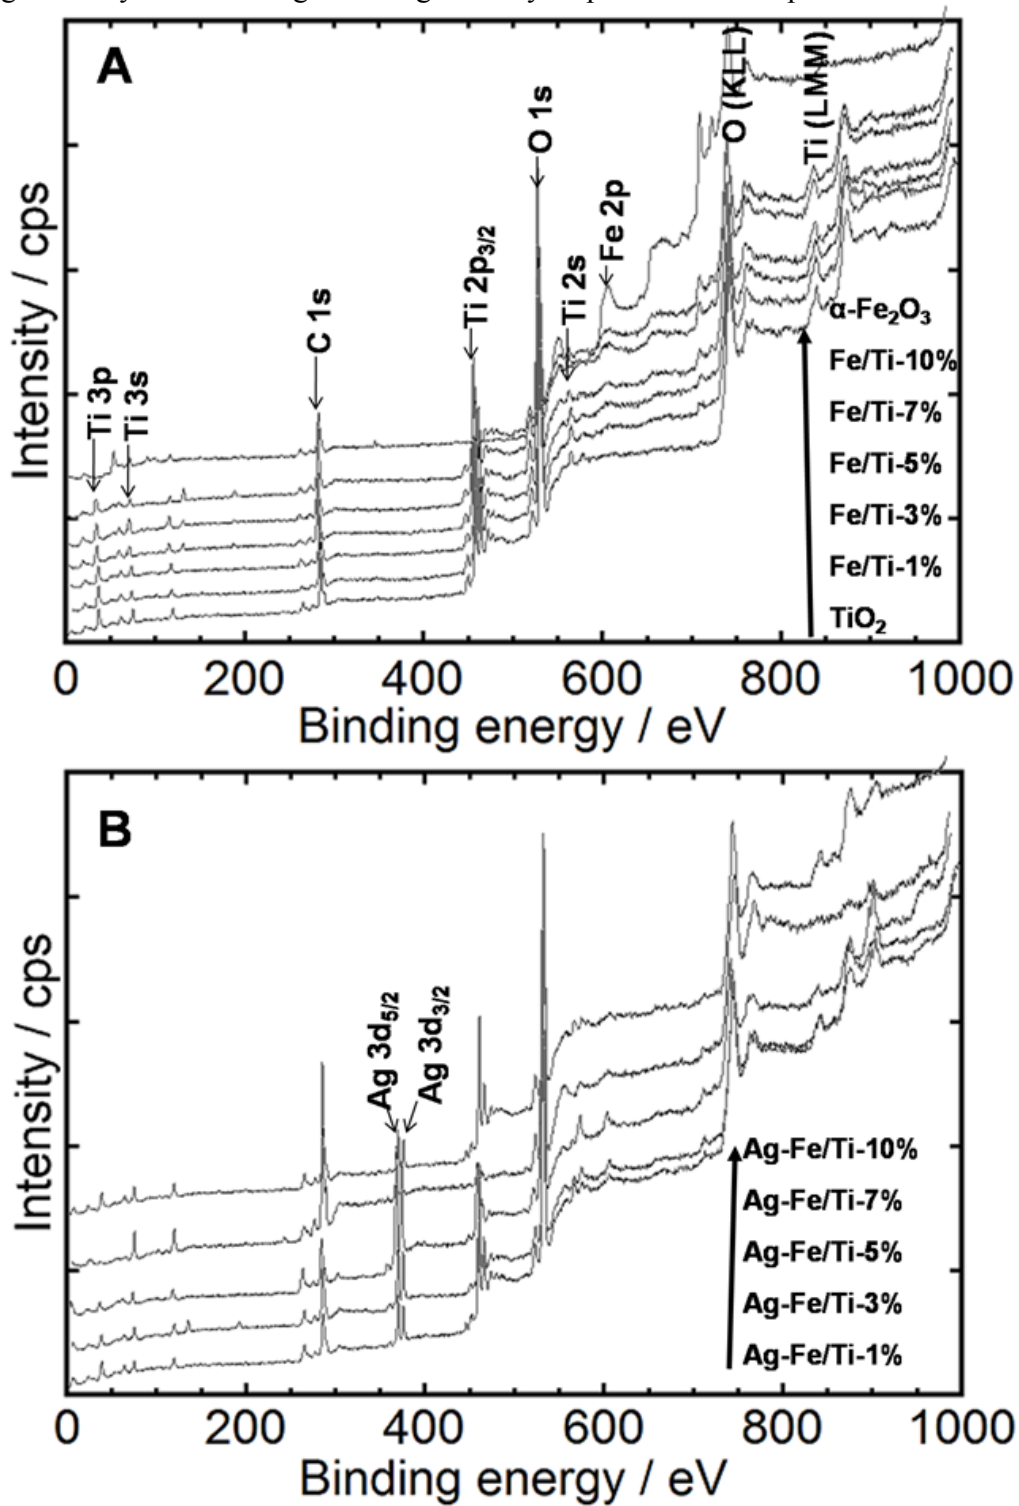

**Fig. S2.** XPS wide range spectra of (A) Fe-doped TiO<sub>2</sub> and (B) Ag@Fe-doped TiO<sub>2</sub>.

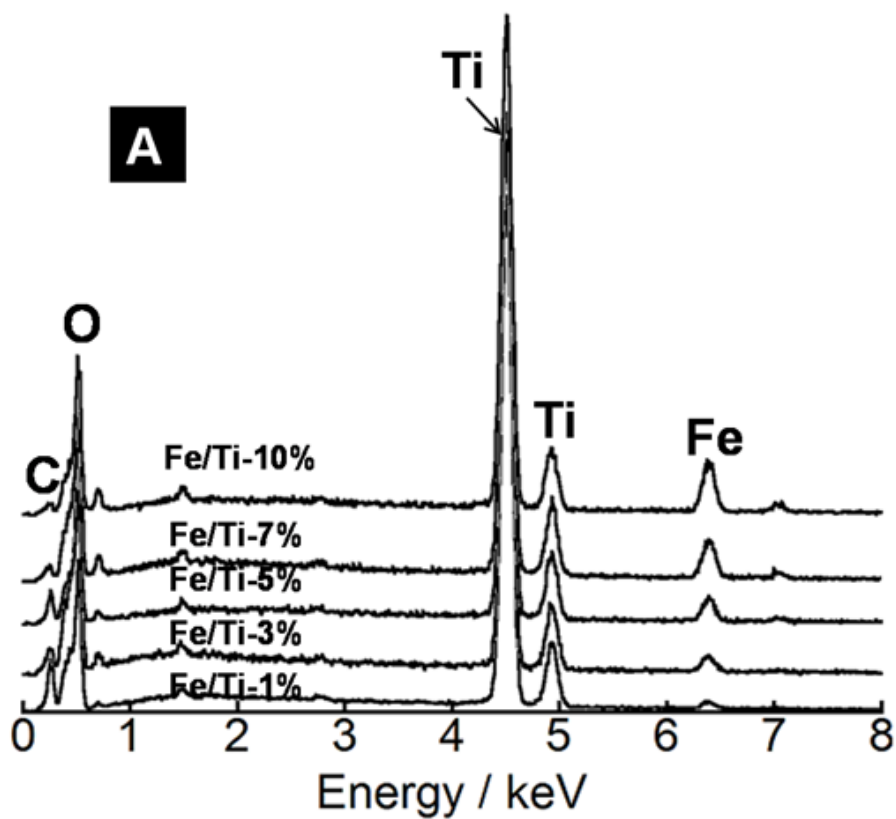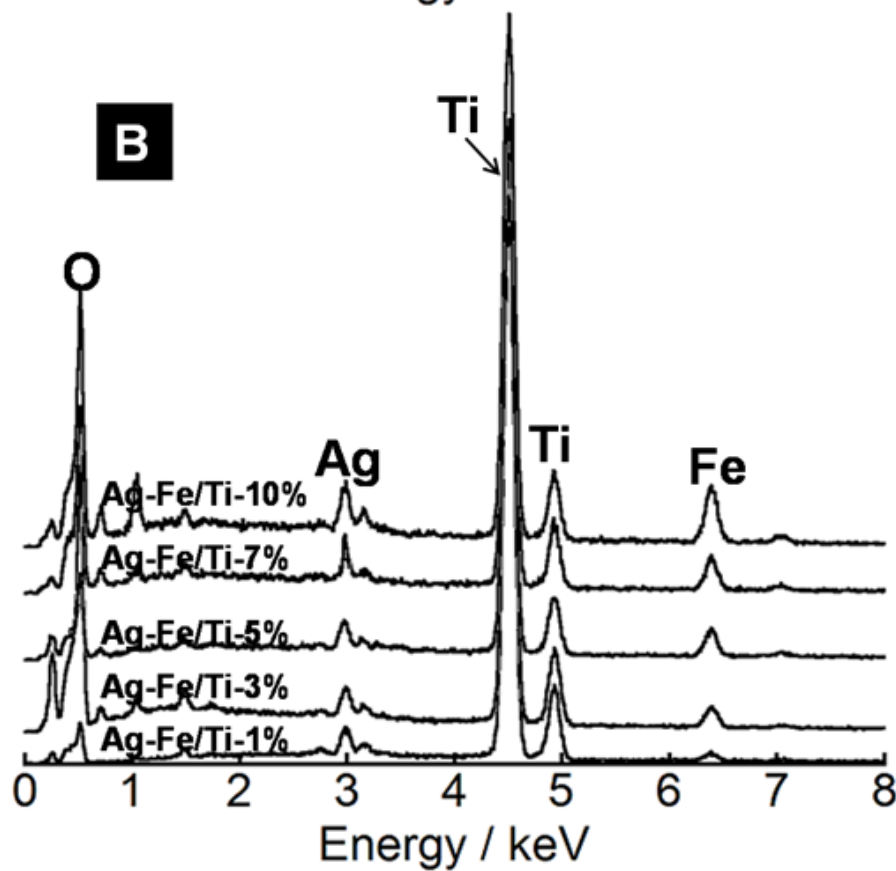

**Fig. S3.** EDX spectra of (A) Fe-doped TiO<sub>2</sub> and (B) Ag@Fe-doped TiO<sub>2</sub>. The strong Ag, Fe and Ti signals in the EDX spectra indicate that Ag is metallic and Ti and Fe consist of mixed oxides.

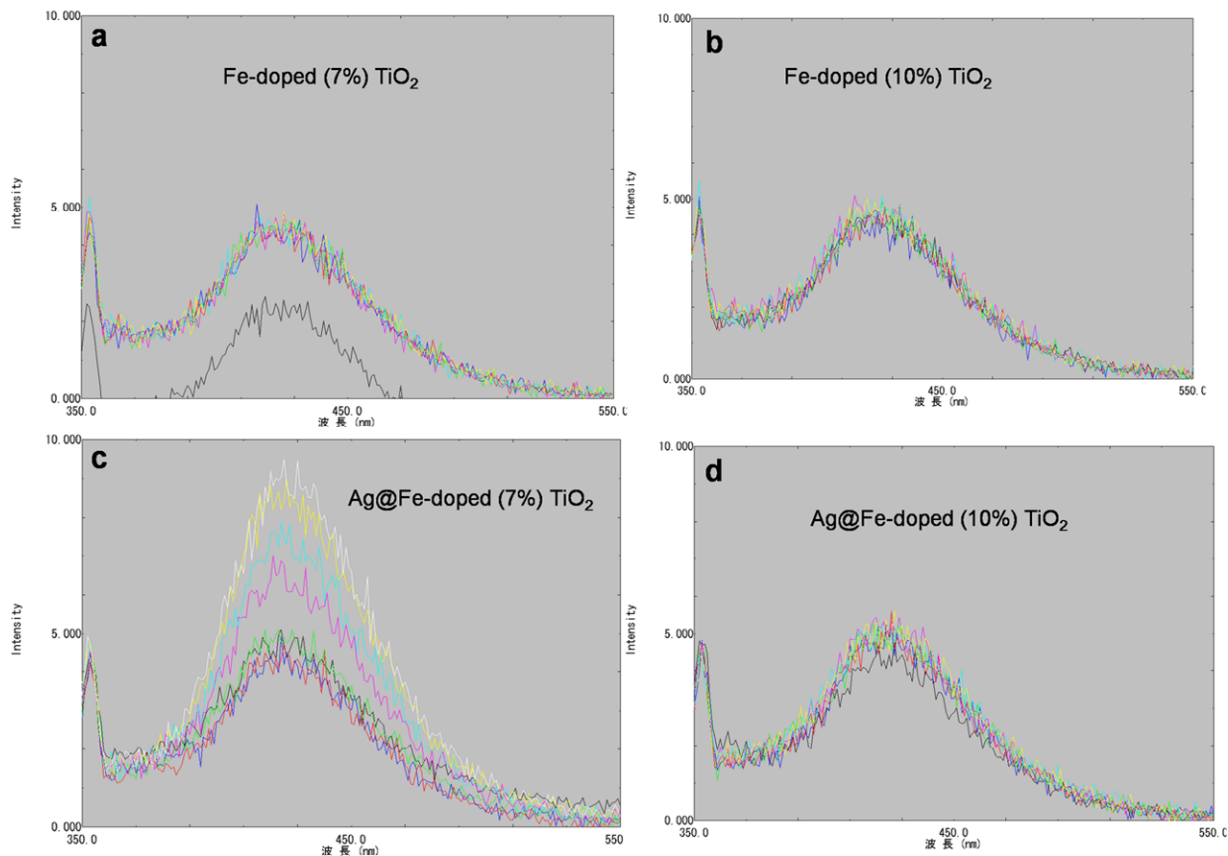

**Fig.S4.** PL spectral changes during irradiation of (a) Fe-doped (7%) TiO<sub>2</sub>, (b) Fe-doped (10%) TiO<sub>2</sub>, (c) Ag@Fe-doped (7%) TiO<sub>2</sub> and (d) Ag@Fe-doped (10%) TiO<sub>2</sub> samples. Each fluorescence spectrum was recorded every 10 min for (a) Fe-doped TiO<sub>2</sub> and 5 min for (b) Ag@Fe-doped TiO<sub>2</sub> under visible irradiation.
